# Supplementary material
Source: Elsevier journal article supplement (https://www.sciencedirect.com/science/article/pii/S2173507720300818)
Supplement: mmc2 [file S2173507720300818:mmc2.docx]

**INSTRUCCIONES PARA LOS INSTRUCTORES EN LA EVALUACIÓN DE ANASTOMOSIS**

**MODELO**

- Simulador físico para laparoscopia (Szabo-Berci-Sackier Laparoscopic Trainer Storz). Monitor, fuente de luz y cámara (Tele Pack X Led Storz).
- Intestino delgado preservado ex-vivo. Dos asas intestinales de 15 cm con anastomosis central de 5 cm.
- Suturas monofilares de 4/0.

**HERRAMIENTA DE EVALUACIÓN**

- Consta de 5 elementos.
- Cada elemento se valora en una escala del 1 al 7, donde cada valor significa:
  - 1 = Riesgo seguro de dehiscencia.
  - 2 = Riesgo muy probable de dehiscencia.
  - 3 = Riesgo probable dehiscencia.
  - 4 = Riesgo mínimo dehiscencia.
  - 5 = Sin riesgo dehiscencia y pobre calidad.
  - 6 = Sin riesgo de dehiscencia y calidad buena.
  - 7 = Sin riesgo de dehiscencia y calidad excelente.
- Existen descriptores para la valoración 1 (calidad de la anastomosis inaceptable), 4 (calidad de la anastomosis aceptable) y 7 (calidad de la anastomosis excelente).
- Además en las instrucciones para el evaluador se describe con más detalle cómo evaluar la calidad de la anastomosis.
- El evaluador debe estimar la puntuación entre 1 y 7 considerando dichos descriptores.

**DESCRIPCIÓN DETALLADA DE CADA ELEMENTO Y DE SU MÉTODO DE EVALUACIÓN**

1. Elemento 1: Separación entre puntos en cara anterior de anastomosis. Se evalúa a través de dos dimensiones:
   1. Distancia:
      1. Se evaluará la cara anterior de la anastomosis.
      2. Se mide con un calibrador en mm.
      3. Modo de efectuar la medición: Distancia entre cada uno de los puntos (mm) ordenadamente de izda. a dcha.
      4. Se considera que la distancia entre puntos es excelente cuando es aproximadamente entre 3-4 mm e inaceptable cuando sea aproximadamente menor a 3 mm o superior a 6mm.
   2. Discrepancia entre puntos:
      1. Es la diferencia en mm entre cada uno de los puntos consecutivos.
      2. Se considera excelente cuando no hay discrepancia e inaceptable cuando la discrepancia cuando es aproximadamente más de 3 mm.
2. Elemento 2: Eversión de mucosa. Se evaluará inspeccionando cada uno de los puntos de la cara anterior de la anastomosis buscando la presencia de mucosa intestinal evertida.
   1. El grado de eversión mucosa se mide en mm.
   2. Es la suma total de los mm evertidos en todos los puntos de la circunferencia de la anastomosis.
   3. Se considera excelente cuando no hay eversión.
   4. Se considera inaceptable cuando hay una eversión total de mucosa aproximadamente mayor de 10 mm o una eversión aislada aproximadamente mayor de 4mm.
3. Elemento 3: Tensión de la sutura.
   1. Se evaluará la cara anterior de la anastomosis
   2. Se medirán dos parámetros:
      1. Hilo sobrante: traccionar con cuidado del hilo se sutura mediante un mosquito o gancho (si es factible) y medir la longitud de hilo que se consigue con esta maniobra (mm)
      2. Medir la longitud total de la anastomosis (mm), teniendo en cuenta que se parte de 2 bocas de 50 mm.
      3. Se considera excelente una medida de la anastomosis de ángulo a ángulo aproximadamente mayor de 40mm y el hilo sobrante después de ejercer tracción es menor de 5 mm.
      4. Se considera inaceptable si la medida de la anastomosis de ángulo a ángulo es aproximadamente menor de 35 mm o si el hilo sobrante después de tensar el mismo en la línea de sutura es aproximadamente mayor de 10mm.
4. Elemento 4: Estanqueidad de la anastomosis.
   1. Para medir la estanqueidad se cerrarán 3 de los cabos intestinales con una sutura.
   2. Por la 4ª boca intestinal se introducirá un catéter para insuflación que se anudara a ésta.
   3. Se sumergirá la pieza en agua
   4. Se insuflará mediante manómetro hasta que esté ligeramente tensa.
   5. Se considerará excelente la ausencia de burbujeo.
   6. Se considerará inaceptable la salida de aire a la mínima insuflación y que no permite la distensión de la pieza.
5. Elemento 5: Iatrogenia. Valoración de la existencia o no de desgarros o deserosamientos en las asas intestinales de la anastomosis.
   1. Se evaluará la anastomosis y asas intestinales en busca de desgarros o perforaciones debidas a la inadecuada manipulación, desechando los extremos de fijación de la pieza al endotrainer.
   2. Medida:
      1. Valorar si existen perforaciones.
      2. Valorar desgarros/deserosamientos sin perforación.
      3. Se considera excelente cuando no hay ninguna lesión.
      4. Se considera inaceptable cuando existe perforación o deserosamientos importantes.

**ORDEN DE EVALUACIÓN: PARA PRESERVAR LA INTEGRIDAD DE LA ANASTOMOSIS**

**Objetivo:** que la anastomosis no se deteriore por la manipulación de un evaluador y pueda ser evaluada por un 2º evaluador.

**Orden de evaluación:**

1. Medición de la longitud de la anastomosis.
2. Distancia entre los puntos.
3. Valorar si se ve mucosa evertida a lo largo de toda la anastomosis.
4. Medir la mucosa evertida (mm).
5. Valorar posibles lesiones iatrogénicas y describirlas.
6. Test de estanqueidad: aire.
7. Tracción de hilo de sutura para valorar si sobra.
