# Supplementary material
Source: Elsevier journal article supplement (https://www.sciencedirect.com/science/article/pii/S2173507720300818)
Supplement: mmc3 [file S2173507720300818:mmc3.docx]

**Herramienta para valorar la calidad de la anastomosis intestinal E-E L-L de 5 cm en simulador físico**

**(Szabo-Berci-Sackier** Laparoscopic Trainer Storz**)**

| **DIMENSIÓN** | **Puntuación** | | | | | | |  |
| --- | --- | --- | --- | --- | --- | --- | --- | --- |
|  | 1 | 2 | 3 | 4 | 5 | 6 | 7 | Puntos |
|  | 1 Riesgo seguro de dehiscencia | 2: Riesgo muy probable de dehiscencia | 3. Riesgo probable dehiscencia | 4. Riesgo mínimo dehiscencia | 5. Sin riesgo dehiscencia y pobre calidad | 6. Sin riesgo de dehiscencia y calidad buena | 7. Sin riesgo de dehiscencia y calidad excelente |  |
| **Elemento 1: Separación entre puntos en cara anterior de anastomosis:** distancia entre cada uno de los puntos y cantidad de puntos que no cumplen la distancia adecuada. | Distancia entre puntos y discrepancia inaceptables |  |  | Distancia entre puntos y discrepancia aceptables |  |  | Distancia entre puntos precisa y sin discrepancia |  |
| **Elemento 2: Eversión de mucosa:** Visualización de la mucosa intestinal fuera de las líneas de sutura,  anterior o posterior de la anastomosis | La eversión de mucosa total es inaceptable |  |  | La eversión de mucosa total es aceptable |  |  | No existe eversión de mucosa |  |
| **Elemento 3: Tensión de la sutura: Elemento 3: Tensión de la sutura:** Valoración del tamaño de la anastomosis  a través de la medición de la longitud de la anastomosis y la tracción del hilo de sutura. | La medida de la anastomosis de ángulo a ángulo es inaceptable  El hilo sobrante después de tensar el mismo en la línea de sutura es inaceptable |  |  | La medida de la anastomosis de ángulo a ángulo es aceptable.  El hilo sobrante después de tensar el mismo en la línea de sutura es aceptable |  |  | La medida de la anastomosis de ángulo a ángulo es precisa.  No hay hilo sobrante después de tensar el mismo |  |
| **Elemento 4:  Estanqueidad:** Evaluación de la fuga de aire a través de las líneas de sutura cuando los intestinos que forman la anastomosis están distendidos. Se considera estanca cuando no existe  fuga de aire por la misma. | Existe salida de aire por cualquier parte de la anastomosis y de forma manifiesta no permite la distensión de la anastomosis. |  |  | Existe pequeña salida de aire  por alguno de los pases de la aguja y no por los puntos con las asas intestinales distendidas. |  |  | No existe salida de aire por ningún punto de la anastomosis y las asas intestinales están distendidas. |  |
| **Total**=1+2+3+4 (mínimo 5 y máximo 28) | | | | | | | | |
